# Supplementary material for: Species determination using AI machine-learning algorithms: Hebeloma as a case study
Source: PubMed Central journal article supplement (PMC9245212; doi:10.1186/s43008-022-00099-x), 2022-06-30
Supplement: 43008_2022_99_MOESM2_ESM.pdf [file 43008_2022_99_MOESM2_ESM.pdf]

**Appendix Table S1.** Results of the identifier using characters from Character Group 7 and standard parameters as in Table 3. For each species, the number of collections that were identified correctly in the identifiers top 5 ‘guesses’ are shown. If a species had any incorrect guesses (i.e. any guess that was not Top 1, then the top guess of the identifier is shown in the ‘Confused as’ column. Species shown in bold in the ‘Confused as’ column are from the same (sub)-section. Species not shown in bold are from different (sub)-sections.

| <b><i>Adherentia</i></b>            | <b>Total</b> | <b>1st</b>      | <b>2nd</b>      | <b>3rd</b>    | <b>4th</b>      | <b>5th</b>    | <b>MRR score</b> | <b>Confused as</b>                                                                                                                                                                                                |
|-------------------------------------|--------------|-----------------|-----------------|---------------|-----------------|---------------|------------------|-------------------------------------------------------------------------------------------------------------------------------------------------------------------------------------------------------------------|
| <i>H. adherens</i>                  | 1            | 0               | 0               | 0             | 1               | 0             | 25               | <i>H. radicosum</i> (1)                                                                                                                                                                                           |
| <b>Total</b>                        | <b>1</b>     | <b>0 (0%)</b>   | <b>0 (0%)</b>   | <b>0 (0%)</b> | <b>1 (100%)</b> | <b>0 (0%)</b> | <b>25</b>        |                                                                                                                                                                                                                   |
| <b>‘Australe’</b>                   | <b>Total</b> | <b>1st</b>      | <b>2nd</b>      | <b>3rd</b>    | <b>4th</b>      | <b>5th</b>    | <b>MRR score</b> | <b>Confused as</b>                                                                                                                                                                                                |
| <i>H. australe</i>                  | 6            | 6               | 0               | 0             | 0               | 0             | 100              |                                                                                                                                                                                                                   |
| <b>Total</b>                        | <b>6</b>     | <b>6 (100%)</b> | <b>0 (0%)</b>   | <b>0 (0%)</b> | <b>0 (0%)</b>   | <b>0 (0%)</b> | <b>100</b>       |                                                                                                                                                                                                                   |
| <b><i>Denudata-Clepsydroida</i></b> | <b>Total</b> | <b>1st</b>      | <b>2nd</b>      | <b>3rd</b>    | <b>4th</b>      | <b>5th</b>    | <b>MRR score</b> | <b>Confused as</b>                                                                                                                                                                                                |
| <i>H. album</i>                     | 11           | 4               | 4               | 2             | 1               | 0             | 62               | <i>H. lutense</i> (1), <b><i>H. cavipes</i></b> (1),<br><i>H. hiemale</i> (1), <b><i>H. ingratum</i></b> (1),<br><b><i>H. limbatum</i></b> (1), <b><i>H. sordidulum</i></b> (1),<br><b><i>H. vaccinum</i></b> (1) |
| <i>H. ammophilum</i>                | 2            | 1               | 0               | 1             | 0               | 0             | 66               | <i>H. velutipes</i> (1)                                                                                                                                                                                           |
| <i>H. asperosporum</i>              | 1            | 1               | 0               | 0             | 0               | 0             | 100              |                                                                                                                                                                                                                   |
| <i>H. cavipes</i>                   | 17           | 13              | 2               | 2             | 0               | 0             | 86               | <b><i>H. limbatum</i></b> (1), <b><i>H. album</i></b> (1),<br><b><i>H. sordidulum</i></b> (1), <b><i>H. ingratum</i></b> (1)                                                                                      |
| <i>H. cinnamomeum</i>               | 3            | 1               | 2               | 0             | 0               | 0             | 66               | <b><i>H. cavipes</i></b> (1), <i>H. hiemale</i> (1)                                                                                                                                                               |
| <i>H. ingratum</i>                  | 4            | 2               | 1               | 0             | 1               | 0             | 68               | <b><i>H. pseudofragilipes</i></b> (1),<br><b><i>H. album</i></b> (1)                                                                                                                                              |
| <i>H. limbatum</i>                  | 3            | 1               | 1               | 0             | 0               | 1             | 56               | <i>H. celatum</i> (1),<br><b><i>H. pseudofragilipes</i></b> (1)                                                                                                                                                   |
| <i>H. matritense</i>                | 1            | 0               | 0               | 0             | 1               | 0             | 25               | <b><i>H. ammophilum</i></b> (1)                                                                                                                                                                                   |
| <i>H. pseudofragilipes</i>          | 12           | 6               | 2               | 1             | 0               | 1             | 64               | <b><i>H. cavipes</i></b> (3), <b><i>H. album</i></b> (1),<br><b><i>H. ingratum</i></b> (1), <i>H. hiemale</i> (1)                                                                                                 |
| <i>H. sordidulum</i>                | 12           | 12              | 0               | 0             | 0               | 0             | 100              |                                                                                                                                                                                                                   |
| <i>H. vaccinum</i>                  | 11           | 10              | 1               | 0             | 0               | 0             | 95               | <i>H. pusillum</i> (1)                                                                                                                                                                                            |
| <b>Total</b>                        | <b>77</b>    | <b>51 (66%)</b> | <b>13 (17%)</b> | <b>6 (8%)</b> | <b>3 (4%)</b>   | <b>2 (3%)</b> | <b>78</b>        |                                                                                                                                                                                                                   |

| <b>Denudata-Crustuliniformia</b> | <b>Total</b> | <b>1st</b>       | <b>2nd</b>      | <b>3rd</b>    | <b>4th</b>    | <b>5th</b>    | <b>MRR score</b> | <b>Confused as</b>                                                                                                                  |
|----------------------------------|--------------|------------------|-----------------|---------------|---------------|---------------|------------------|-------------------------------------------------------------------------------------------------------------------------------------|
| <i>H. aanenii</i>                | 12           | 7                | 5               | 0             | 0             | 0             | 79               | <b><i>H. geminatum</i></b> (5)                                                                                                      |
| <i>H. alpinum</i>                | 24           | 19               | 3               | 1             | 0             | 0             | 87               | <b><i>H. eburneum</i></b> (2), <b><i>H. hiemale</i></b> (2),<br><b><i>H. crustuliniforme</i></b> (1)                                |
| <i>H. arcticum</i>               | 3            | 3                | 0               | 0             | 0             | 0             | 100              |                                                                                                                                     |
| <i>H. aurantioumbrinum</i>       | 5            | 4                | 1               | 0             | 0             | 0             | 90               | <i>H. hiemale</i> (1)                                                                                                               |
| <i>H. bellotianum</i>            | 0            | 0                | 0               | 0             | 0             | 0             | -                |                                                                                                                                     |
| <i>H. crustuliniforme</i>        | 8            | 5                | 2               | 0             | 1             | 0             | 78               | <b><i>H. eburneum</i></b> (2), <b><i>H. aanenii</i></b> (1)                                                                         |
| <i>H. eburneum</i>               | 27           | 21               | 4               | 2             | 0             | 0             | 87               | <b><i>H. alpinum</i></b> (3), <b><i>H. album</i></b> (1),<br><b><i>H. lutense</i></b> (1),<br><b><i>H. luteicystidiatum</i></b> (1) |
| <i>H. geminatum</i>              | 9            | 8                | 1               | 0             | 0             | 0             | 94               | <b><i>H. aanenii</i></b> (1)                                                                                                        |
| <i>H. helodes</i>                | 10           | 10               | 0               | 0             | 0             | 0             | 100              |                                                                                                                                     |
| <i>H. louiseae</i>               | 2            | 1                | 0               | 1             | 0             | 0             | 66               | <b><i>H. aurantioumbrinum</i></b> (1)                                                                                               |
| <i>H. luteicystidiatum</i>       | 1            | 0                | 0               | 1             | 0             | 0             | 33               | <b><i>H. louiseae</i></b> (1)                                                                                                       |
| <i>H. lutense</i>                | 5            | 5                | 0               | 0             | 0             | 0             | 100              |                                                                                                                                     |
| <i>H. magnicystidiatum</i>       | 0            | 0                | 0               | 0             | 0             | 0             | -                |                                                                                                                                     |
| <i>H. minus</i>                  | 6            | 5                | 1               | 0             | 0             | 0             | 91               | <b><i>H. pusillum</i></b> (1)                                                                                                       |
| <i>H. pallidolabiatum</i>        | 2            | 2                | 0               | 0             | 0             | 0             | 100              |                                                                                                                                     |
| <i>H. perexiguum</i>             | 0            | 0                | 0               | 0             | 0             | 0             | -                |                                                                                                                                     |
| <i>H. pusillum</i>               | 6            | 5                | 0               | 0             | 0             | 0             | 85               | <i>H. paludicola</i> (1)                                                                                                            |
| <i>H. salicicola</i>             | 8            | 8                | 0               | 0             | 0             | 0             | 100              |                                                                                                                                     |
| <b>Total</b>                     | <b>128</b>   | <b>103 (80%)</b> | <b>17 (13%)</b> | <b>5 (4%)</b> | <b>1 (1%)</b> | <b>0 (0%)</b> | <b>88</b>        |                                                                                                                                     |
| <b>Denudata-Echinospora</b>      | <b>Total</b> | <b>1st</b>       | <b>2nd</b>      | <b>3rd</b>    | <b>4th</b>    | <b>5th</b>    | <b>MRR score</b> | <b>Confused as</b>                                                                                                                  |
| <i>H. echinosporum</i>           | 0            | 0                | 0               | 0             | 0             | 0             | -                |                                                                                                                                     |
| <i>H. populinum</i>              | 1            | 1                | 0               | 0             | 0             | 0             | 100              |                                                                                                                                     |
| <i>H. rostratum</i>              | 4            | 3                | 1               | 0             | 0             | 0             | 87               | <b><i>H. populinum</i></b> (1)                                                                                                      |
| <b>Total</b>                     | <b>5</b>     | <b>4 (80%)</b>   | <b>1 (20%)</b>  | <b>0 (0%)</b> | <b>0 (0%)</b> | <b>0 (0%)</b> | <b>89</b>        |                                                                                                                                     |

| <b><i>Denudata-Hiemalia</i></b>   | <b>Total</b> | <b>1st</b>      | <b>2nd</b>      | <b>3rd</b>    | <b>4th</b>    | <b>5th</b>    | <b>MRR score</b> | <b>Confused as</b>                                                           |
|-----------------------------------|--------------|-----------------|-----------------|---------------|---------------|---------------|------------------|------------------------------------------------------------------------------|
| <i>H. hiemale</i>                 | 19           | 18              | 0               | 1             | 0             | 0             | 96               | <i>H. crustuliniforme</i> (1)                                                |
| <b>Total</b>                      | <b>19</b>    | <b>18 (95%)</b> | <b>0 (0%)</b>   | <b>1 (5%)</b> | <b>0 (0%)</b> | <b>0 (0%)</b> | <b>96</b>        |                                                                              |
| <b><i>Duracinus</i></b>           | <b>Total</b> | <b>1st</b>      | <b>2nd</b>      | <b>3rd</b>    | <b>4th</b>    | <b>5th</b>    | <b>MRR score</b> | <b>Confused as</b>                                                           |
| <i>H. duracinoides</i>            | 2            | 2               | 0               | 0             | 0             | 0             | 100              |                                                                              |
| <b>Total</b>                      | <b>2</b>     | <b>2 (100%)</b> | <b>0 (0%)</b>   | <b>0 (0%)</b> | <b>0 (0%)</b> | <b>0 (0%)</b> | <b>100</b>       |                                                                              |
| <b><i>Hebeloma</i>-‘subject1’</b> | <b>Total</b> | <b>1st</b>      | <b>2nd</b>      | <b>3rd</b>    | <b>4th</b>    | <b>5th</b>    | <b>MRR score</b> | <b>Confused as</b>                                                           |
| <i>H. fuscatum</i>                | 5            | 3               | 1               | 1             | 0             | 0             | 76               | <i>H. nigellum</i> (1), <i>H. paludicola</i> (1)                             |
| <i>H. grandisporum</i>            | 1            | 0               | 0               | 1             | 0             | 0             | 33               | <i>H. spetsbergense</i> (1)                                                  |
| <i>H. monticola</i>               | 6            | 5               | 1               | 0             | 0             | 0             | 91               | <i>H. palustre</i> (1)                                                       |
| <i>H. nigellum</i>                | 7            | 3               | 3               | 1             | 0             | 0             | 69               | <i>H. fuscatum</i> (3), <i>H. paludicola</i> (1)                             |
| <i>H. paludicola</i>              | 8            | 5               | 0               | 1             | 1             | 0             | 71               | <i>H. fuscatum</i> (3)                                                       |
| <i>H. palustre</i>                | 24           | 23              | 1               | 0             | 0             | 0             | 97               | <i>H. monticola</i> (1)                                                      |
| <i>H. sordescens</i>              | 5            | 2               | 1               | 1             | 0             | 0             | 60               | <i>H. palustre</i> (2), <i>H. monticola</i> (1)                              |
| <i>H. spetsbergense</i>           | 14           | 8               | 3               | 1             | 0             | 0             | 72               | <i>H. fuscatum</i> (3), <i>H. nigellum</i> (2),<br><i>H. paludicola</i> (1)  |
| <b>Total</b>                      | <b>70</b>    | <b>49 (70%)</b> | <b>10 (14%)</b> | <b>6 (9%)</b> | <b>1 (1%)</b> | <b>0 (0%)</b> | <b>80</b>        |                                                                              |
| <b><i>Hebeloma</i>-‘subject2’</b> | <b>Total</b> | <b>1st</b>      | <b>2nd</b>      | <b>3rd</b>    | <b>4th</b>    | <b>5th</b>    | <b>MRR score</b> | <b>Confused as</b>                                                           |
| <i>H. alpinicola</i>              | 15           | 8               | 2               | 1             | 1             | 0             | 66               | <i>H. excedens</i> (4),<br><i>H. mesophaeum</i> (3)                          |
| <i>H. ambustiterratum</i>         | 6            | 6               | 0               | 0             | 0             | 0             | 100              |                                                                              |
| <i>H. cistophilum</i>             | 6            | 5               | 1               | 0             | 0             | 0             | 91               | <i>H. subtortum</i> (1)                                                      |
| <i>H. colvinii</i>                | 3            | 3               | 0               | 0             | 0             | 0             | 100              |                                                                              |
| <i>H. excedens</i>                | 14           | 4               | 6               | 3             | 1             | 0             | 58               | <i>H. alpinicola</i> (5),<br><i>H. mesophaeum</i> (3), <i>H. velatum</i> (2) |
| <i>H. harperi</i>                 | 2            | 2               | 0               | 0             | 0             | 0             | 100              |                                                                              |

| <b><i>Hebeloma</i>-‘subject2’</b><br>continued | <b>Total</b> | <b>1st</b>      | <b>2nd</b>      | <b>3rd</b>    | <b>4th</b>    | <b>5th</b>    | <b>MRR score</b> | <b>Confused as</b>                                    |
|------------------------------------------------|--------------|-----------------|-----------------|---------------|---------------|---------------|------------------|-------------------------------------------------------|
| <i>H. marginatulum</i>                         | 6            | 4               | 1               | 0             | 0             | 1             | 78               | <i>H. alpinicola</i> (1),<br><i>H. mesophaeum</i> (1) |
| <i>H. mesophaeum</i>                           | 16           | 12              | 3               | 1             | 0             | 0             | 86               | <i>H. alpinicola</i> (2), <i>H. excedens</i> (2)      |
| <i>H. pascuense</i>                            | 1            | 0               | 0               | 0             | 1             | 0             | 25               | <i>H. excedens</i> (1)                                |
| <i>H. psammophilum</i>                         | 2            | 1               | 1               | 0             | 0             | 0             | 75               | <i>H. cistophilum</i> (1)                             |
| <i>H. pubescens</i>                            | 2            | 2               | 0               | 0             | 0             | 0             | 100              |                                                       |
| <i>H. subtortum</i>                            | 7            | 5               | 2               | 0             | 0             | 0             | 85               | <i>H. mesophaeum</i> (2)                              |
| <i>H. velatum</i>                              | 14           | 13              | 1               | 0             | 0             | 0             | 96               | <i>H. marginatulum</i> (1)                            |
| <b>Total</b>                                   | <b>94</b>    | <b>65 (69%)</b> | <b>17 (18%)</b> | <b>5 (5%)</b> | <b>3 (3%)</b> | <b>1 (1%)</b> | <b>80</b>        |                                                       |
| <b>‘Islandica’</b>                             | <b>Total</b> | <b>1st</b>      | <b>2nd</b>      | <b>3rd</b>    | <b>4th</b>    | <b>5th</b>    | <b>MRR score</b> | <b>Confused as</b>                                    |
| <i>H. islandicum</i>                           | 1            | 0               | 0               | 0             | 0             | 0             | 9                | <i>H. pallidolabiatum</i> (1)                         |
| <b>Total</b>                                   | <b>1</b>     | <b>0 (0%)</b>   | <b>0 (0%)</b>   | <b>0 (0%)</b> | <b>0 (0%)</b> | <b>0 (0%)</b> | <b>9</b>         |                                                       |
| <b>‘Mediorufa’</b>                             | <b>Total</b> | <b>1st</b>      | <b>2nd</b>      | <b>3rd</b>    | <b>4th</b>    | <b>5th</b>    | <b>MRR score</b> | <b>Confused as</b>                                    |
| <i>H. lacteocoffeatum</i>                      | 0            | 0               | 0               | 0             | 0             | 0             | -                |                                                       |
| <i>H. mediorufum</i>                           | 0            | 0               | 0               | 0             | 0             | 0             | -                |                                                       |
| <i>H. nothofagatorum</i>                       | 0            | 0               | 0               | 0             | 0             | 0             | -                |                                                       |
| <b>Total</b>                                   | <b>0</b>     | <b>0</b>        | <b>0 (0%)</b>   | <b>0 (0%)</b> | <b>0 (0%)</b> | <b>0 (0%)</b> | <b>-</b>         |                                                       |
| <b><i>Myxocybe</i></b>                         | <b>Total</b> | <b>1st</b>      | <b>2nd</b>      | <b>3rd</b>    | <b>4th</b>    | <b>5th</b>    | <b>MRR score</b> | <b>Confused as</b>                                    |
| <i>H. radicosum</i>                            | 4            | 4               | 0               | 0             | 0             | 0             | 100              |                                                       |
| <i>H. sagarae</i>                              | 1            | 1               | 0               | 0             | 0             | 0             | 100              |                                                       |
| <b>Total</b>                                   | <b>5</b>     | <b>5 (100%)</b> | <b>0 (0%)</b>   | <b>0 (0%)</b> | <b>0 (0%)</b> | <b>0 (0%)</b> | <b>100</b>       |                                                       |

| <b><i>Naviculospora</i></b> | <b>Total</b> | <b>1st</b>      | <b>2nd</b>     | <b>3rd</b>    | <b>4th</b>    | <b>5th</b>    | <b>MRR score</b> | <b>Confused as</b>                                                                             |
|-----------------------------|--------------|-----------------|----------------|---------------|---------------|---------------|------------------|------------------------------------------------------------------------------------------------|
| <i>H. avellaneum</i>        | 3            | 3               | 0              | 0             | 0             | 0             | 100              |                                                                                                |
| <i>H. catalaunicum</i>      | 2            | 1               | 1              | 0             | 0             | 0             | 75               | <i>H. velutipes</i> (1)                                                                        |
| <i>H. nanum</i>             | 5            | 2               | 2              | 0             | 0             | 1             | 64               | <i>H. cylindrosporum</i> (1),<br><i>H. circinans</i> (1),<br><b><i>H. catalaunicum</i></b> (1) |
| <i>H. naviculosporum</i>    | 4            | 3               | 0              | 0             | 1             | 0             | 81               | <i>H. cavipes</i> (1)                                                                          |
| <i>H. sub australe</i>      | 2            | 2               | 0              | 0             | 0             | 0             | 100              |                                                                                                |
| <i>H. subfastibile</i>      | 1            | 1               | 0              | 0             | 0             | 0             | 100              |                                                                                                |
| <b>Total</b>                | <b>17</b>    | <b>12 (71%)</b> | <b>3 (18%)</b> | <b>0 (0%)</b> | <b>1 (6%)</b> | <b>1 (6%)</b> | <b>82</b>        |                                                                                                |

  

| <b><i>Porphyrospora</i></b> | <b>Total</b> | <b>1st</b>      | <b>2nd</b>    | <b>3rd</b>    | <b>4th</b>    | <b>5th</b>    | <b>MRR score</b> | <b>Confused as</b>           |
|-----------------------------|--------------|-----------------|---------------|---------------|---------------|---------------|------------------|------------------------------|
| <i>H. aminophilum</i>       | 4            | 4               | 0             | 0             | 0             | 0             | 100              |                              |
| <i>H. angustilamellatum</i> | 2            | 1               | 0             | 0             | 1             | 0             | 62               | <i>H. danicum</i> (1)        |
| <i>H. flavidifolium</i>     | 1            | 1               | 0             | 0             | 0             | 0             | 100              |                              |
| <i>H. ifeleletorum</i>      | 0            | 0               | 0             | 0             | 0             | 0             | -                |                              |
| <i>H. indicum</i>           | 0            | 0               | 0             | 0             | 0             | 0             | -                |                              |
| <i>H. lactariolens</i>      | 1            | 0               | 0             | 1             | 0             | 0             | 33               | <b><i>H. youngii</i></b> (1) |
| <i>H. parvisporum</i>       | 1            | 1               | 0             | 0             | 0             | 0             | 100              |                              |
| <i>H. porphyrosporum</i>    | 2            | 2               | 0             | 0             | 0             | 0             | 100              |                              |
| <i>H. radicans</i>          | 0            | 0               | 0             | 0             | 0             | 0             | -                |                              |
| <i>H. sarcophyllum</i>      | 0            | 0               | 0             | 0             | 0             | 0             | -                |                              |
| <i>H. victoriense</i>       | 1            | 1               | 0             | 0             | 0             | 0             | 100              |                              |
| <i>H. vinosophyllum</i>     | 1            | 1               | 0             | 0             | 0             | 0             | 100              |                              |
| <i>H. youngii</i>           | 0            | 0               | 0             | 0             | 0             | 0             | -                |                              |
| <b>Total</b>                | <b>13</b>    | <b>11 (85%)</b> | <b>0 (0%)</b> | <b>1 (8%)</b> | <b>1 (8%)</b> | <b>0 (0%)</b> | <b>89</b>        |                              |

  

| <b><i>Pseudoamarens</i></b> | <b>Total</b> | <b>1st</b>      | <b>2nd</b>    | <b>3rd</b>    | <b>4th</b>    | <b>5th</b>    | <b>MRR score</b> | <b>Confused as</b> |
|-----------------------------|--------------|-----------------|---------------|---------------|---------------|---------------|------------------|--------------------|
| <i>H. pseudoamarens</i>     | 4            | 4               | 0             | 0             | 0             | 0             | 100              |                    |
| <b>Total</b>                | <b>4</b>     | <b>4 (100%)</b> | <b>0 (0%)</b> | <b>0 (0%)</b> | <b>0 (0%)</b> | <b>0 (0%)</b> | <b>100</b>       |                    |

| <b>Sacchariolentia</b>  | <b>Total</b> | <b>1st</b>      | <b>2nd</b>    | <b>3rd</b>     | <b>4th</b>    | <b>5th</b>    | <b>MRR score</b> | <b>Confused as</b>                                     |
|-------------------------|--------------|-----------------|---------------|----------------|---------------|---------------|------------------|--------------------------------------------------------|
| <i>H. fuisporum</i>     | 3            | 2               | 0             | 0              | 1             | 0             | 75               | <i>H. ischnostylum</i> (1)                             |
| <i>H. ischnostylum</i>  | 5            | 4               | 0             | 1              | 0             | 0             | 86               | <i>H. fuisporum</i> (1)                                |
| <i>H. nauseosum</i>     | 5            | 4               | 0             | 1              | 0             | 0             | 86               | <i>H. pusillum</i> (1)                                 |
| <i>H. odoratissimum</i> | 4            | 0               | 0             | 3              | 0             | 0             | 28               | <i>H. nauseosum</i> (2),<br><i>H. duracinoides</i> (2) |
| <i>H. sacchariolens</i> | 5            | 4               | 1             | 0              | 0             | 0             | 90               | <i>H. leucosarx</i> (1)                                |
| <b>Total</b>            | <b>22</b>    | <b>14 (64%)</b> | <b>1 (5%)</b> | <b>5 (23%)</b> | <b>1 (5%)</b> | <b>0 (0%)</b> | <b>74</b>        |                                                        |

  

| <b>Scabrispora</b>       | <b>Total</b> | <b>1st</b>      | <b>2nd</b>    | <b>3rd</b>    | <b>4th</b>    | <b>5th</b>    | <b>MRR score</b> | <b>Confused as</b>                          |
|--------------------------|--------------|-----------------|---------------|---------------|---------------|---------------|------------------|---------------------------------------------|
| <i>H. anthracophilum</i> | 5            | 4               | 0             | 0             | 0             | 1             | 84               | <i>H. ischnostylum</i> (1)                  |
| <i>H. birrus</i>         | 10           | 10              | 0             | 0             | 0             | 0             | 100              |                                             |
| <i>H. circinans</i>      | 5            | 5               | 0             | 0             | 0             | 0             | 100              |                                             |
| <i>H. cylindrosporum</i> | 6            | 5               | 0             | 1             | 0             | 0             | 88               | <i>H. pseudoamarescens</i> (1)              |
| <i>H. danicum</i>        | 5            | 5               | 0             | 0             | 0             | 0             | 100              |                                             |
| <i>H. laterinum</i>      | 12           | 12              | 0             | 0             | 0             | 0             | 100              |                                             |
| <i>H. lindae</i>         | 3            | 2               | 1             | 0             | 0             | 0             | 83               | <i>H. quercetorum</i> (1)                   |
| <i>H. luchuense</i>      | 1            | 1               | 0             | 0             | 0             | 0             | 100              |                                             |
| <i>H. melleum</i>        | 1            | 0               | 1             | 0             | 0             | 0             | 50               | <i>H. pumilum</i> (1)                       |
| <i>H. pumilum</i>        | 6            | 4               | 2             | 0             | 0             | 0             | 83               | <i>H. birrus</i> (1), <i>H. melleum</i> (1) |
| <i>H. radicosoides</i>   | 2            | 2               | 0             | 0             | 0             | 0             | 100              |                                             |
| <i>H. viscidissimum</i>  | 5            | 4               | 0             | 1             | 0             | 0             | 86               | <i>H. velutipes</i> (1)                     |
| <b>Total</b>             | <b>61</b>    | <b>54 (89%)</b> | <b>4 (7%)</b> | <b>2 (3%)</b> | <b>0 (0%)</b> | <b>1 (2%)</b> | <b>93</b>        |                                             |

  

| <b>Sinapizantia</b>  | <b>Total</b> | <b>1st</b>      | <b>2nd</b>    | <b>3rd</b>    | <b>4th</b>    | <b>5th</b>    | <b>MRR score</b> | <b>Confused as</b>    |
|----------------------|--------------|-----------------|---------------|---------------|---------------|---------------|------------------|-----------------------|
| <i>H. bulbiferum</i> | 5            | 4               | 1             | 0             | 0             | 0             | 90               | <i>H. celatum</i> (1) |
| <i>H. sinapizans</i> | 12           | 12              | 0             | 0             | 0             | 0             | 100              |                       |
| <b>Total</b>         | <b>17</b>    | <b>16 (94%)</b> | <b>1 (6%)</b> | <b>0 (0%)</b> | <b>0 (0%)</b> | <b>0 (0%)</b> | <b>97</b>        |                       |

| <b>Syrjense</b>           | <b>Total</b> | <b>1st</b>      | <b>2nd</b>      | <b>3rd</b>    | <b>4th</b>    | <b>5th</b>    | <b>MRR score</b> | <b>Confused as</b>                                                       |
|---------------------------|--------------|-----------------|-----------------|---------------|---------------|---------------|------------------|--------------------------------------------------------------------------|
| <i>H. syrjense</i>        | 6            | 6               | 0               | 0             | 0             | 0             | 100              |                                                                          |
| <b>Total</b>              | <b>6</b>     | <b>6 (100%)</b> | <b>0 (0%)</b>   | <b>0 (0%)</b> | <b>0 (0%)</b> | <b>0 (0%)</b> | <b>100</b>       |                                                                          |
| <b>Theobromina</b>        | <b>Total</b> | <b>1st</b>      | <b>2nd</b>      | <b>3rd</b>    | <b>4th</b>    | <b>5th</b>    | <b>MRR score</b> | <b>Confused as</b>                                                       |
| <i>H. alboerumpens</i>    | 1            | 0               | 1               | 0             | 0             | 0             | 50               | <i>H. theobrominum</i> (1)                                               |
| <i>H. cohaerens</i>       | 1            | 1               | 0               | 0             | 0             | 0             | 100              |                                                                          |
| <i>H. erumpens</i>        | 2            | 1               | 1               | 0             | 0             | 0             | 75               | <i>H. griseopruinatum</i> (1)                                            |
| <i>H. griseopruinatum</i> | 4            | 3               | 1               | 0             | 0             | 0             | 87               | <i>H. erumpens</i> (1)                                                   |
| <i>H. parvicystidium</i>  | 4            | 4               | 0               | 0             | 0             | 0             | 100              |                                                                          |
| <i>H. plesiocistum</i>    | 2            | 2               | 0               | 0             | 0             | 0             | 100              |                                                                          |
| <i>H. theobrominum</i>    | 9            | 7               | 0               | 1             | 0             | 0             | 81               | <i>H. nanum</i> (2)                                                      |
| <i>H. vesterholtii</i>    | 7            | 4               | 2               | 0             | 0             | 1             | 74               | <i>H. theobrominum</i> (2), <i>H. nanum</i> (1)                          |
| <b>Total</b>              | <b>30</b>    | <b>22 (73%)</b> | <b>5 (17%)</b>  | <b>1 (3%)</b> | <b>0 (0%)</b> | <b>1 (3%)</b> | <b>83</b>        |                                                                          |
| <b>Velutipes</b>          | <b>Total</b> | <b>1st</b>      | <b>2nd</b>      | <b>3rd</b>    | <b>4th</b>    | <b>5th</b>    | <b>MRR score</b> | <b>Confused as</b>                                                       |
| <i>H. aestivale</i>       | 11           | 10              | 1               | 0             | 0             | 0             | 95               | <i>H. ischnostylum</i> (1)                                               |
| <i>H. albidulum</i>       | 7            | 7               | 0               | 0             | 0             | 0             | 100              |                                                                          |
| <i>H. celatum</i>         | 6            | 3               | 0               | 2             | 1             | 0             | 65               | <i>H. quercetorum</i> (2),<br><i>H. velutipes</i> (1)                    |
| <i>H. citrisporum</i>     | 1            | 0               | 1               | 0             | 0             | 0             | 50               | <i>H. celatum</i> (1)                                                    |
| <i>H. erebium</i>         | 5            | 4               | 1               | 0             | 0             | 0             | 90               | <i>H. celatum</i> (1)                                                    |
| <i>H. incarnatum</i>      | 7            | 5               | 2               | 0             | 0             | 0             | 85               | <i>H. velutipes</i> (2)                                                  |
| <i>H. leucosarx</i>       | 12           | 4               | 6               | 1             | 1             | 0             | 63               | <i>H. velutipes</i> (8)                                                  |
| <i>H. neurophyllum</i>    | 6            | 6               | 0               | 0             | 0             | 0             | 100              |                                                                          |
| <i>H. quercetorum</i>     | 4            | 4               | 0               | 0             | 0             | 0             | 100              |                                                                          |
| <i>H. subconcolor</i>     | 3            | 3               | 0               | 0             | 0             | 0             | 100              |                                                                          |
| <i>H. velutipes</i>       | 32           | 26              | 6               | 0             | 0             | 0             | 90               | <i>H. leucosarx</i> (4), <i>H. alpinum</i> (1),<br><i>H. celatum</i> (1) |
| <b>Total</b>              | <b>94</b>    | <b>72 (77%)</b> | <b>17 (18%)</b> | <b>3 (3%)</b> | <b>2 (2%)</b> | <b>0 (0%)</b> | <b>86</b>        |                                                                          |
